# Supplementary material for: Diels–Alder attachment of a planar organic molecule to a dangling bond dimer on a hydrogenated semiconductor surface
Source: Royal Society of Chemistry journal article supplement (doi:10.1039/c6cp02346k), 2016-01-01
Supplement: c6cp02346k1.pdf [file c6cp02346k1.pdf]

## Supporting Information

### 1. LDOS of $\pi$ – LUMO bonding state

The localized density of states (LDOS) at the  $\Gamma$  point was plotted for  $\pi$  – LUMO bonding state of trinaphthylene molecule attached to the DB dimer by [4+2] addition on outer ring (Fig. S1). The LDOS shows that the  $\pi$  – LUMO bonding state has an important molecular contribution and is coupled to the surface through the DB dimer states.

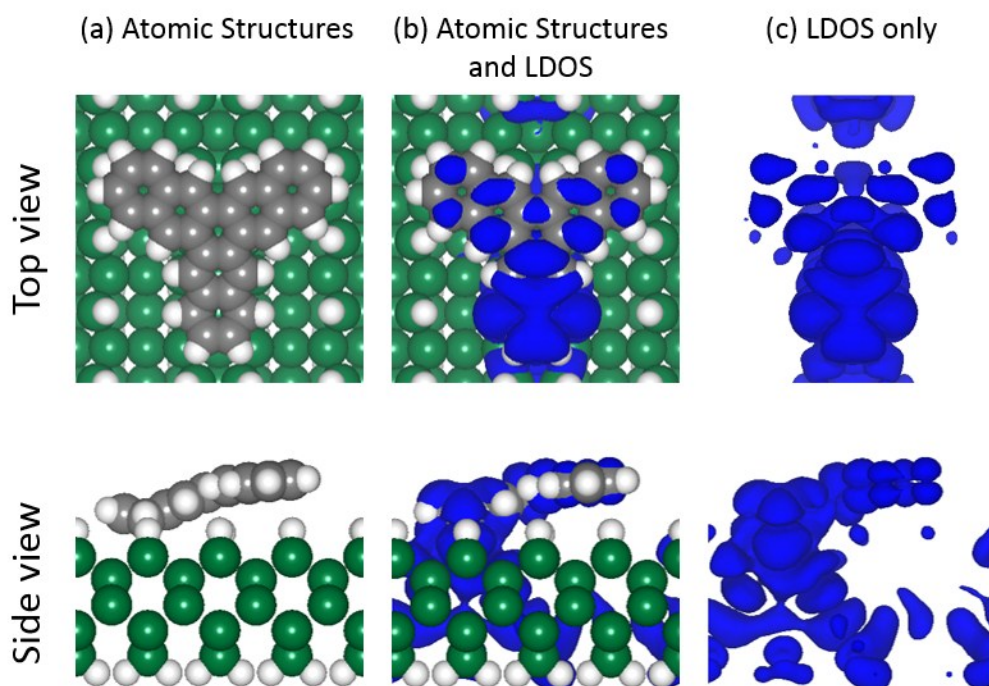

**Figure S1.** Top and side views of (a) atomic structures, (b) atomic structure and LDOS, and (c) LDOS only for  $\pi$  – LUMO bonding state of trinaphthylene molecule attached to the DB dimer by [4+2] addition on outer ring at the  $\Gamma$  point.

### 2. Band structures and PDOS of trinaphthylene molecule on a Ge(001):H DB dimer

The EHMO band structures and PDOS of trinaphthylene molecule on a Ge(001):H DB dimer at different heights were calculated to determine how the bonding and anti-bonding states evolve with the molecule-surface distance (Fig. S2). Note that the trinaphthylene molecule was kept at the deformed structure ([4+2] addition on outer ring), and only the distance between the molecule and surface was varied. As the molecule is positioned closer to the surface,  $\pi$  and  $\pi^*$  states interact with LUMO and HOMO states, respectively, and are shifted in energy. Although the  $\pi$  – LUMO and  $\pi^*$  – HOMO bonding states are observable on the PDOS plots, no significant peaks are observed in the conduction band (Fig. S2h) because the anti-bonding  $\pi$  – LUMO and  $\pi^*$  – HOMO interaction have large dispersion in the band structure (Fig. S2b-d).

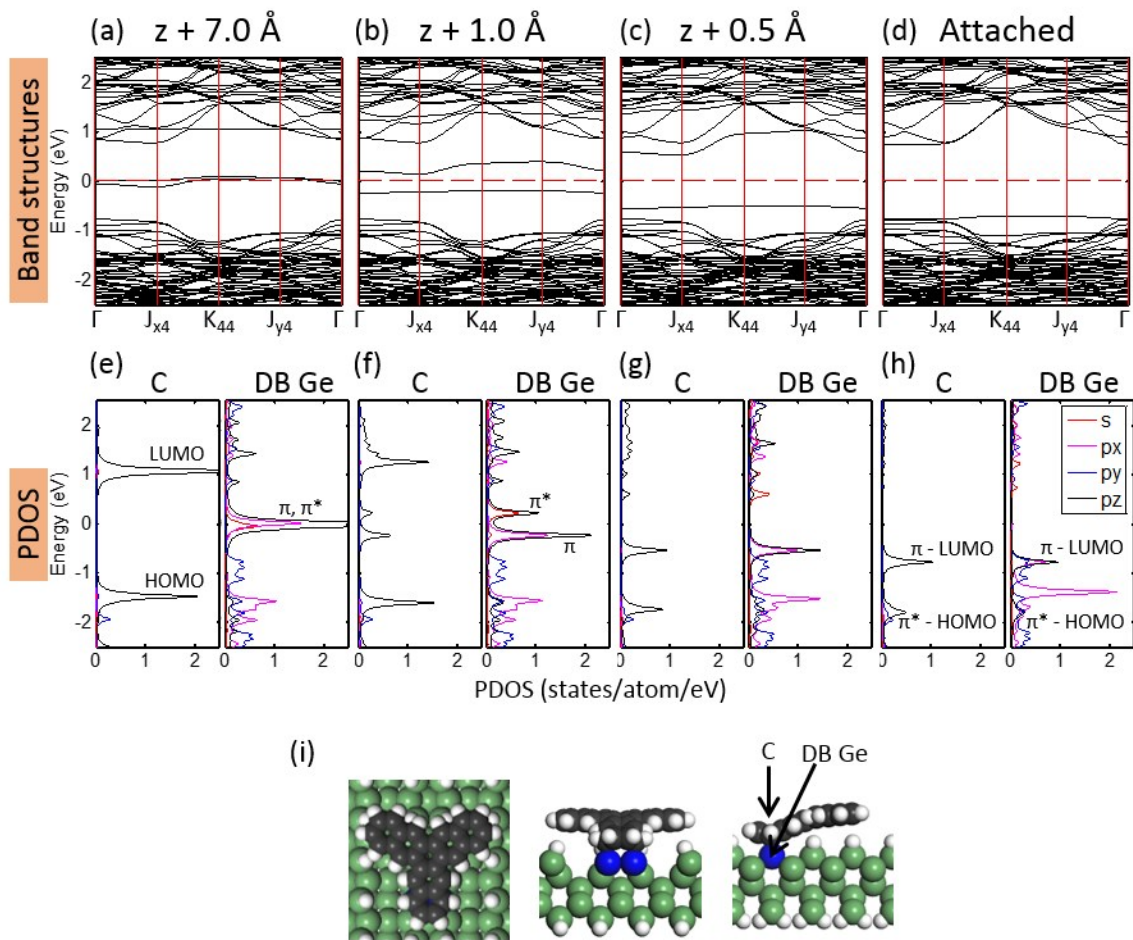

**Figure S2.** Band structures of trinaphthylene on a Ge(001):H DB dimer shifted higher in height compared to the attached geometry ([4+2] addition on outer ring) by (a) 7.0 Å, (b) 1.0 Å, (c) 0.5 Å, and (d) 0 Å (attached). (e)-(h) Corresponding PDOS ( $\Gamma$  point) projected on C atom above the DB and DB Ge atom. The geometry of trinaphthylene molecule was kept at deformed structure, and only the molecule-surface distance was varied. (i) Unit cell (4×4, 5-layer slab) used in the band structure and PDOS calculations. The atoms used for PDOS are labeled.
